# Supplementary material for: Diverse redox chemistry of photo/ferrioxalate system
Source: Royal Society of Chemistry journal article supplement (doi:10.1039/c4ra07153k), 2014-01-01
Supplement: c4ra07153k1.pdf [file c4ra07153k1.pdf]

# SUPPORTING INFORMATION

## Diverse Redox Chemistry of Photo/Ferrioxalate System

Zhaohui Wang\*, Dongxue Xiao, Jianshe Liu

*College of Environmental Science and Engineering, Donghua University, Shanghai,  
201620, China*

\*Corresponding author: [zhaohuiwang@dhu.edu.cn](mailto:zhaohuiwang@dhu.edu.cn)

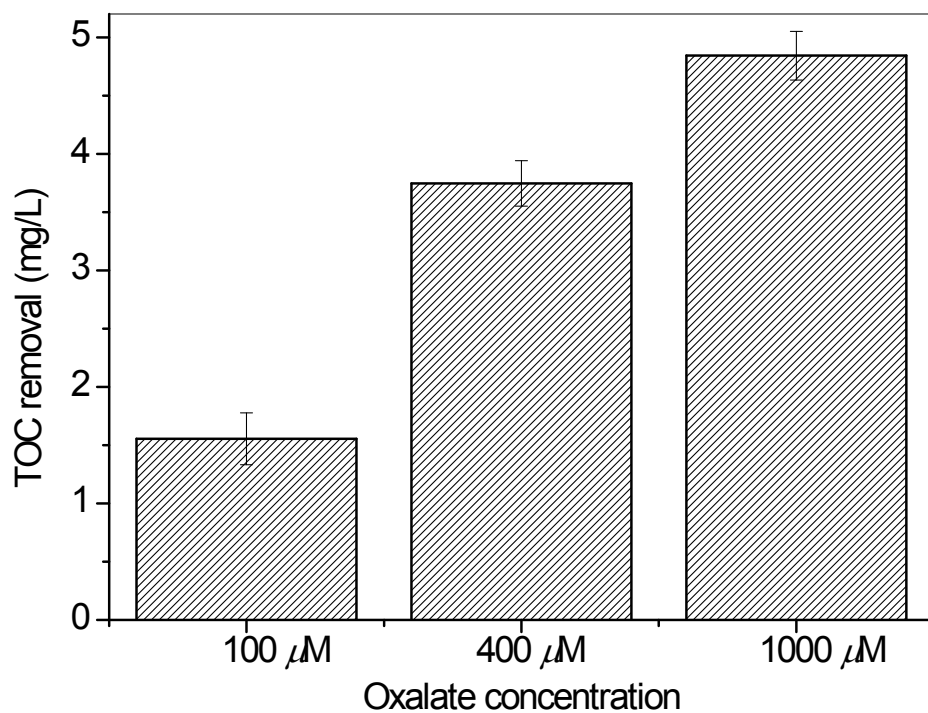

**Fig. S1.** TOC removal of oxalate in the presence of 200  $\mu\text{M}$  Fe(III) under UV irradiation.

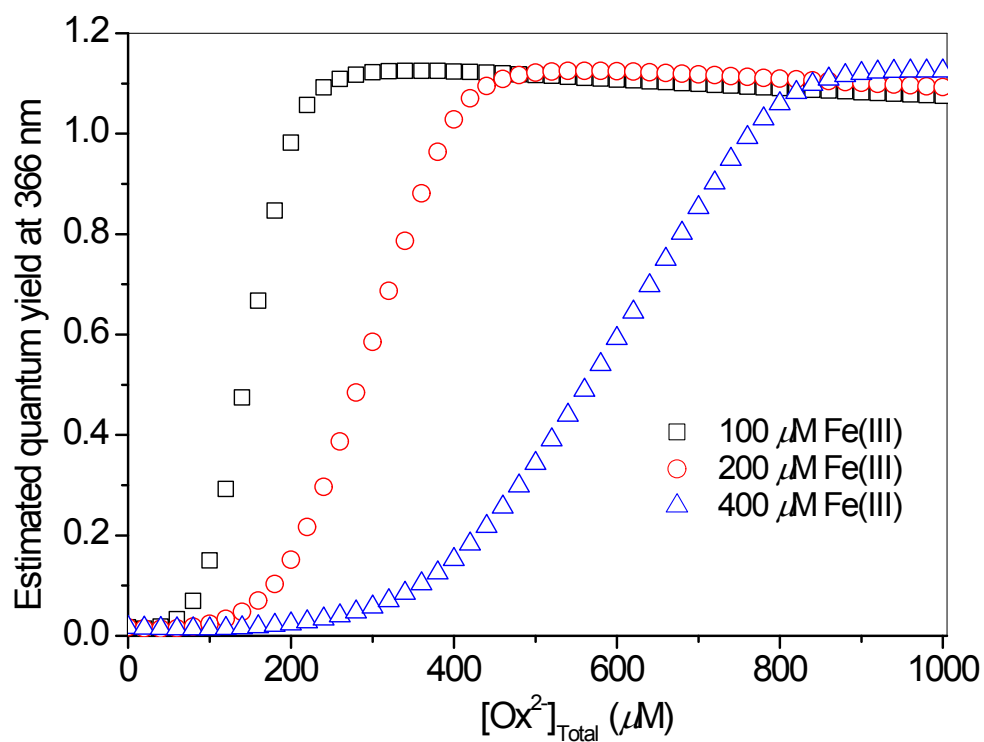

**Fig. S2.** The estimated quantum yield of the overall photoreaction as a function of oxalate concentration.
